# Supplementary material
Source: MDPI journal article supplement (https://www.mdpi.com/1424-8247/16/5/717)
Supplement: s1 [file s1]

## SUPPLEMENT

**Table S1. The Lipinski drug-likeness parameters of AVNs: highlighting positive bioactivity scores in yellow and optimal drug-like compounds in red.**

| Labels                                                                    | Subst.                                                      | milogP | TPSA<br>(Å <sup>32</sup> ) | nAtoms | MW<br>(g/Mol) | nHBD | nHBA | nRB | nVIOL | Volume<br>(Å <sup>3</sup> ) | GPCRL | ICHM  | KI    | NRL   | PI    | EI    |
|---------------------------------------------------------------------------|-------------------------------------------------------------|--------|----------------------------|--------|---------------|------|------|-----|-------|-----------------------------|-------|-------|-------|-------|-------|-------|
| Dinberg/<br>Collins                                                       |                                                             |        |                            |        |               |      |      |     |       |                             |       |       |       |       |       |       |
| <i>Derivatives of 2-[(1-Oxo-3-phenyl-2-propen-1-yl)amino]benzoic acid</i> |                                                             |        |                            |        |               |      |      |     |       |                             |       |       |       |       |       |       |
| 1a*                                                                       | R <sub>1</sub> -R <sub>5</sub> =H                           | 3.51   | 66.40                      | 20     | 267.28        | 4    | 2    | 4   | 0     | 241.26                      | -0.18 | -0.15 | -0.29 | -0.06 | -0.31 | -0.04 |
| 1p/D                                                                      | R <sub>4</sub> =OH                                          | 3.03   | 86.62                      | 21     | 283.28        | 5    | 3    | 4   | 0     | 249.27                      | -0.10 | -0.10 | -0.20 | 0.11  | -0.27 | 0.01  |
| 1c/F                                                                      | R <sub>3,4</sub> =OH                                        | 2.54   | 106.85                     | 22     | 299.28        | 6    | 4    | 4   | 0     | 257.29                      | -0.09 | -0.12 | -0.20 | 0.10  | -0.24 | -0.00 |
| 1f/E                                                                      | R <sub>4</sub> =OCH <sub>3</sub>                            | 2.85   | 95.86                      | 23     | 313.31        | 6    | 3    | 5   | 0     | 274.82                      | -0.13 | -0.20 | -0.20 | 0.03  | -0.29 | -0.05 |
| 1s                                                                        | R <sub>3,5</sub> =OH,<br>R <sub>4</sub> =OCH <sub>3</sub>   | 2.87   | 105.09                     | 25     | 343.33        | 7    | 3    | 6   | 0     | 300.37                      | -0.13 | -0.18 | -0.17 | 0.01  | -0.23 | -0.03 |
| 2a*                                                                       | R <sub>2</sub> =OH                                          | 3.01   | 86.62                      | 21     | 283.28        | 5    | 3    | 4   | 0     | 249.27                      | -0.11 | -0.12 | -0.22 | 0.12  | -0.28 | 0.00  |
| 2p/A                                                                      | R <sub>2,4</sub> =OH                                        | 2.53   | 106.85                     | 22     | 299.28        | 6    | 4    | 4   | 0     | 257.29                      | -0.08 | -0.11 | -0.19 | 0.15  | -0.23 | 0.00  |
| 2c/C                                                                      | R <sub>2,3,4</sub> =OH                                      | 2.04   | 127.08                     | 23     | 315.28        | 7    | 5    | 4   | 0     | 265.31                      | -0.05 | -0.10 | -0.15 | 0.17  | -0.20 | 0.02  |
| 2f/B                                                                      | R <sub>2,4</sub> =OH,<br>R <sub>3</sub> =OCH <sub>3</sub>   | 2.35   | 116.09                     | 24     | 329.31        | 7    | 4    | 5   | 0     | 282.84                      | -0.10 | -0.17 | -0.16 | 0.09  | -0.26 | -0.03 |
| 2s*                                                                       | R <sub>2,4</sub> =OH,<br>R <sub>3,5</sub> =OCH <sub>3</sub> | 2.36   | 125.32                     | 26     | 359.33        | 8    | 4    | 6   | 0     | 308.38                      | -0.12 | -0.16 | -0.14 | 0.06  | -0.22 | -0.01 |
| 2m*                                                                       | R <sub>2</sub> =OH,<br>R <sub>3,4,5</sub> =OCH <sub>3</sub> | 2.64   | 114.33                     | 27     | 373.36        | 8    | 3    | 7   | 0     | 325.91                      | -0.11 | -0.17 | -0.15 | 0.02  | -0.23 | -0.04 |
| 3a*                                                                       | R <sub>1</sub> =OCH <sub>3</sub> ,<br>R <sub>2</sub> =OH    | 2.83   | 95.86                      | 23     | 313.31        | 6    | 3    | 5   | 0     | 274.82                      | -0.13 | -0.19 | -0.18 | 0.01  | -0.30 | -0.05 |
| 3p                                                                        | R <sub>1</sub> =OCH <sub>3</sub>                            | 2.35   | 116.09                     | 24     | 329.31        | 7    | 4    | 5   | 0     | 282.84                      | -0.10 | -0.17 | -0.15 | 0.07  | -0.27 | -0.04 |

|                                                                                  |                                                                                        |      |        |    |        |   |   |   |   |        |       |       |       |       |       |       |
|----------------------------------------------------------------------------------|----------------------------------------------------------------------------------------|------|--------|----|--------|---|---|---|---|--------|-------|-------|-------|-------|-------|-------|
| 3c                                                                               | R <sub>2,4</sub> =OH,<br>R <sub>1</sub> =OCH <sub>3</sub> ,<br>R <sub>2,3,4</sub> =OH, | 1.86 | 136.31 | 25 | 345.31 | 8 | 5 | 5 | 0 | 290.86 | -0.12 | -0.18 | -0.17 | 0.02  | -0.25 | -0.05 |
| 3f                                                                               | R <sub>1,3</sub> =OCH <sub>3</sub> ,<br>R <sub>2,4</sub> =OH,                          | 2.17 | 125.32 | 26 | 359.33 | 8 | 4 | 6 | 0 | 308.38 | -0.12 | -0.18 | -0.17 | 0.02  | -0.24 | -0.05 |
| 3h* (1)                                                                          | R <sub>1,3,5</sub> =OCH <sub>3</sub> ,<br>R <sub>2</sub> =OH,                          | 2.87 | 114.33 | 27 | 373.36 | 8 | 3 | 7 | 0 | 325.91 | -0.12 | -0.18 | -0.16 | 0.04  | -0.24 | -0.05 |
| 3h* (2)                                                                          | R <sub>1,3,4</sub> =OCH <sub>3</sub> ,<br>R <sub>2</sub> =OH,                          | 2.47 | 114.33 | 27 | 373.36 | 8 | 3 | 7 | 0 | 325.91 | -0.11 | -0.17 | -0.16 | 0.02  | -0.23 | -0.05 |
| 4p/G                                                                             | R <sub>1,4</sub> =OH,                                                                  | 2.53 | 106.85 | 22 | 299.28 | 6 | 4 | 4 | 0 | 257.29 | -0.09 | -0.10 | -0.16 | 0.12  | -0.23 | 0.00  |
| 4c/K                                                                             | R <sub>1,3,4</sub> =OH,                                                                | 2.04 | 127.08 | 23 | 315.28 | 7 | 5 | 4 | 0 | 265.31 | -0.06 | -0.10 | -0.14 | 0.15  | -0.21 | 0.01  |
| 4f                                                                               | R <sub>1,4</sub> =OH,<br>R <sub>3</sub> =OCH <sub>3</sub> ,                            | 2.35 | 116.09 | 24 | 329.31 | 7 | 4 | 5 | 0 | 282.84 | -0.10 | -0.17 | -0.15 | 0.07  | -0.27 | -0.04 |
| 5a*                                                                              | R <sub>1,2</sub> =OH,                                                                  | 2.52 | 106.85 | 22 | 299.28 | 6 | 4 | 4 | 0 | 257.29 | -0.10 | -0.12 | -0.18 | 0.07  | -0.25 | -0.00 |
| 5p                                                                               | R <sub>1,3,4</sub> =OH,                                                                | 2.04 | 127.08 | 23 | 315.28 | 7 | 5 | 4 | 0 | 265.31 | -0.06 | -0.10 | -0.14 | 0.15  | -0.21 | 0.01  |
| 5c                                                                               | R <sub>1,2,3,4</sub> =OH,                                                              | 1.55 | 147.31 | 24 | 331.28 | 8 | 6 | 4 | 1 | 273.33 | -0.07 | -0.12 | -0.16 | 0.10  | -0.19 | -0.01 |
| 5f                                                                               | R <sub>1,2,4</sub> =OH,<br>R <sub>3</sub> =OCH <sub>3</sub> ,                          | 1.86 | 136.31 | 25 | 345.31 | 8 | 5 | 5 | 0 | 290.86 | -0.12 | -0.18 | -0.17 | 0.02  | -0.25 | -0.05 |
| 5s*                                                                              | R <sub>1,2,4</sub> =OH,<br>R <sub>3,5</sub> =OCH <sub>3</sub> ,                        | 1.87 | 145.55 | 27 | 375.33 | 9 | 5 | 6 | 0 | 316.40 | -0.12 | -0.16 | -0.13 | -0.00 | -0.23 | -0.01 |
| Tranilast                                                                        | R <sub>3,4</sub> =OCH <sub>3</sub> ,                                                   | 3.16 | 84.86  | 24 | 327.34 | 6 | 2 | 6 | 0 | 292.35 | -0.14 | -0.22 | -0.22 | -0.02 | -0.25 | -0.09 |
| A2                                                                               | R <sub>1,3</sub> =OH,<br>R <sub>2,4</sub> =OCH <sub>3</sub> ,                          | 0.75 | 128.48 | 26 | 361.35 | 8 | 5 | 6 | 0 | 314.25 | -0.09 | -0.10 | -0.09 | 0.03  | -0.17 | 0.00  |
| DHA D                                                                            | R <sub>4</sub> =OH,                                                                    | 3.00 | 86.62  | 21 | 285.30 | 5 | 3 | 5 | 0 | 255.46 | -0.03 | -0.07 | -0.22 | 0.05  | -0.13 | -0.00 |
| Derivatives of 2-[[[(2E,4E)-5-phenyl-1-oxo-2,4-pentadien-1-yl]amino]benzoic acid |                                                                                        |      |        |    |        |   |   |   |   |        |       |       |       |       |       |       |
| 1pd                                                                              | R <sub>4</sub> =OH,                                                                    | 3.55 | 86.62  | 23 | 309.32 | 5 | 3 | 5 | 0 | 276.69 | 0.02  | -0.12 | -0.03 | 0.17  | -0.13 | 0.09  |
| 1cd                                                                              | R <sub>3,4</sub> =OH,                                                                  | 3.06 | 106.85 | 24 | 325.32 | 6 | 4 | 5 | 0 | 284.71 | 0.01  | -0.14 | -0.05 | 0.13  | -0.13 | 0.07  |

|       |                                                               |      |        |    |        |   |   |   |   |        |       |       |       |      |       |      |
|-------|---------------------------------------------------------------|------|--------|----|--------|---|---|---|---|--------|-------|-------|-------|------|-------|------|
| 1fd   | R <sub>3</sub> =OCH <sub>3</sub> ,<br>R <sub>4</sub> =OH,     | 3.37 | 95.86  | 25 | 339.35 | 6 | 3 | 6 | 0 | 302.24 | -0.04 | -0.20 | -0.07 | 0.06 | -0.20 | 0.02 |
| 2ad*  | R <sub>2</sub> =OH,                                           | 3.53 | 86.62  | 23 | 309.32 | 5 | 3 | 5 | 0 | 276.69 | 0.02  | -0.13 | -0.05 | 0.18 | -0.14 | 0.08 |
| 2pd/L | R <sub>2,4</sub> =OH,                                         | 3.05 | 106.85 | 24 | 325.32 | 6 | 4 | 5 | 0 | 284.71 | 0.02  | -0.12 | -0.04 | 0.18 | -0.12 | 0.08 |
| 2cd   | R <sub>2,3,4</sub> =OH,                                       | 2.56 | 127.08 | 25 | 341.32 | 7 | 5 | 5 | 0 | 292.73 | 0.03  | -0.11 | -0.03 | 0.18 | -0.11 | 0.09 |
| 2fd/P | R <sub>2,4</sub> =OH,<br>R <sub>3</sub> =OCH <sub>3</sub> ,   | 2.87 | 116.09 | 26 | 355.35 | 7 | 4 | 6 | 0 | 310.25 | -0.02 | -0.18 | -0.05 | 0.10 | -0.18 | 0.04 |
| 2sd*  | R <sub>2,4</sub> =OH,<br>R <sub>3,5</sub> =OCH <sub>3</sub> , | 2.88 | 125.32 | 28 | 385.37 | 8 | 4 | 7 | 0 | 335.80 | -0.04 | -0.17 | -0.04 | 0.07 | -0.17 | 0.06 |
| 3pd   | R <sub>2,4</sub> =OH,<br>R <sub>1</sub> =OCH <sub>3</sub>     | 2.87 | 116.09 | 26 | 355.35 | 7 | 4 | 6 | 0 | 310.25 | -0.03 | -0.18 | -0.04 | 0.09 | -0.20 | 0.04 |
| 3cd   | R <sub>2,3,4</sub> =OH,<br>R <sub>1</sub> =OCH <sub>3</sub>   | 2.38 | 136.31 | 27 | 371.35 | 8 | 5 | 6 | 0 | 318.27 | -0.04 | -0.19 | -0.06 | 0.04 | -0.19 | 0.02 |
| 3fd   | R <sub>2,4</sub> =OH,<br>R <sub>1,3</sub> =OCH <sub>3</sub>   | 2.68 | 125.32 | 28 | 385.37 | 8 | 4 | 7 | 0 | 335.80 | -0.04 | -0.18 | -0.06 | 0.04 | -0.19 | 0.02 |
| 5pd   | R <sub>1,2,4</sub> =OH                                        | 2.56 | 127.08 | 25 | 341.32 | 7 | 5 | 5 | 0 | 292.73 | 0.03  | -0.11 | -0.02 | 0.16 | -0.12 | 0.09 |
| 5cd   | R <sub>1,2,3,4</sub> =OH                                      | 2.07 | 147.31 | 26 | 357.32 | 8 | 6 | 5 | 1 | 300.74 | 0.00  | -0.13 | -0.04 | 0.11 | -0.12 | 0.07 |
| 5fd   | R <sub>1,2,4</sub> =OH,<br>R <sub>3</sub> =OCH <sub>3</sub>   | 2.38 | 136.31 | 27 | 371.35 | 8 | 5 | 6 | 0 | 318.27 | -0.04 | -0.19 | -0.06 | 0.04 | -0.19 | 0.02 |

AVNs marked with \* are only of synthetic origin.

milogP –partition coefficient in system n-octanol:water, TPSA – topological polar surface area, nAtoms – number of atomns, MW = molecular weight, nHBD-number of H-bond donors, nHBA-number of H-bond acceptors, nRB-number of rotatable bonds and bioactivity score prediction, calculated by MOLINSPIRATION

**Table S2. The OSIRIS calculations of AVNs provided in “semaphore” colors.**

| Labels Dinberg/<br><i>Collins</i>                                  | Subst.                                                        | Mutagenic | Tumorigenic | Irritant | Reproductive<br>effective | cLogP | Solubility | MW    | TPSA  | Druglikeness | Drug-Score |
|--------------------------------------------------------------------|---------------------------------------------------------------|-----------|-------------|----------|---------------------------|-------|------------|-------|-------|--------------|------------|
| Derivatives of 2-[(1-Oxo-3-phenyl-2-propen-1-yl)amino]benzoic acid |                                                               |           |             |          |                           |       |            |       |       |              |            |
| 1a*                                                                | R <sub>1</sub> -R <sub>5</sub> =H                             | ●         | ●           | ●        | ●                         | 2.62  | -3.51      | 267.0 | 66.4  | -0.92        | 0.35       |
| 1p/ <i>D</i>                                                       | R <sub>4</sub> =OH                                            | ●         | ●           | ●        | ●                         | 2.28  | -3.21      | 283.0 | 86.63 | 0.62         | 0.46       |
| 1c/ <i>F</i>                                                       | R <sub>3,4</sub> =OH                                          | ●         | ●           | ●        | ●                         | 1.93  | -2.92      | 299.0 | 106.8 | 1.46         | 0.51       |
| 1f/ <i>E</i>                                                       | R <sub>4</sub> =OCH <sub>3</sub>                              | ●         | ●           | ●        | ●                         | 2.21  | -3.23      | 313.0 | 95.86 | 1.1          | 0.48       |
| 1s                                                                 | R <sub>3,5</sub> =OH,<br>R <sub>4</sub> =OCH <sub>3</sub>     | ●         | ●           | ●        | ●                         | 2.14  | -3.25      | 343.0 | 105.0 | 1.79         | 0.5        |
| 2a*                                                                | R <sub>2</sub> =OH                                            | ●         | ●           | ●        | ●                         | 2.28  | -3.21      | 283.0 | 86.63 | -2.93        | 0.46       |
| 2p/ <i>A</i>                                                       | R <sub>2,4</sub> =OH                                          | ●         | ●           | ●        | ●                         | 1.93  | -2.92      | 299.0 | 106.8 | -1.37        | 0.53       |
| 2c/ <i>C</i>                                                       | R <sub>2,3,4</sub> =OH                                        | ●         | ●           | ●        | ●                         | 1.58  | -2.62      | 315.0 | 127.0 | -0.58        | 0.61       |
| 2f/ <i>B</i>                                                       | R <sub>2,4</sub> =OH,<br>R <sub>3</sub> =OCH <sub>3</sub>     | ●         | ●           | ●        | ●                         | 1.86  | -2.94      | 329.0 | 116.0 | -0.94        | 0.45       |
| 2s*                                                                | R <sub>2,4</sub> =OH,<br>R <sub>3,5</sub> =OCH <sub>3</sub>   | ●         | ●           | ●        | ●                         | 1.79  | -2.95      | 359.0 | 125.3 | -0.15        | 0.5        |
| 2m*                                                                | R <sub>2</sub> =OH,<br>R <sub>3,4,5</sub> =OCH <sub>3</sub>   | ●         | ●           | ●        | ●                         | 2.07  | -3.27      | 373.0 | 114.3 | 1.97         | 0.62       |
| 3a*                                                                | R <sub>1</sub> =OCH <sub>3</sub> ,<br>R <sub>2</sub> =OH,     | ●         | ●           | ●        | ●                         | 2.21  | -3.23      | 313.0 | 95.86 | -3.33        | 0.44       |
| 3p                                                                 | R <sub>1</sub> =OCH <sub>3</sub> ,<br>R <sub>2,4</sub> =OH,   | ●         | ●           | ●        | ●                         | 1.86  | -2.94      | 329.0 | 116.0 | -1.8         | 0.5        |
| 3c                                                                 | R <sub>1</sub> =OCH <sub>3</sub> ,<br>R <sub>2,3,4</sub> =OH, | ●         | ●           | ●        | ●                         | 1.51  | -2.64      | 345.0 | 136.3 | -0.97        | 0.56       |
| 3f                                                                 | R <sub>1,3</sub> =OCH <sub>3</sub> ,<br>R <sub>2,4</sub> =OH, | ●         | ●           | ●        | ●                         | 1.79  | -2.95      | 359.0 | 125.3 | -1.45        | 0.41       |
| 3h* (1)                                                            | R <sub>1,3,5</sub> =OCH <sub>3</sub> ,                        | ●         | ●           | ●        | ●                         | 2.07  | -3.27      | 373.0 | 114.3 | -11.08       | 0.33       |

|                                                                                  |                                        |   |   |   |   |      |       |       |       |       |      |
|----------------------------------------------------------------------------------|----------------------------------------|---|---|---|---|------|-------|-------|-------|-------|------|
|                                                                                  | R <sub>2</sub> =OH,                    |   |   |   |   |      |       |       |       |       |      |
| 3h* (2)                                                                          | R <sub>1,3,4</sub> =OCH <sub>3</sub> , | ● | ● | ● | ● | 2.07 | -3.27 | 373.0 | 114.3 | 0.19  | 0.51 |
|                                                                                  | R <sub>2</sub> =OH,                    |   |   |   |   |      |       |       |       |       |      |
| 4p/G                                                                             | R <sub>1,4</sub> =OH,                  | ● | ● | ● | ● | 1.93 | -2.92 | 299.0 | 106.8 | -1.93 | 0.5  |
| 4c/K                                                                             | R <sub>1,3,4</sub> =OH,                | ● | ● | ● | ● | 1.58 | -2.62 | 315.0 | 127.0 | -1.14 | 0.56 |
|                                                                                  | R <sub>1,4</sub> =OH,                  |   |   |   |   |      |       |       |       |       |      |
| 4f                                                                               | R <sub>3</sub> =OCH <sub>3</sub> ,     | ● | ● | ● | ● | 1.86 | -2.94 | 329.0 | 116.0 | -1.53 | 0.41 |
| 5a*                                                                              | R <sub>1,2</sub> =OH,                  | ● | ● | ● | ● | 1.93 | -2.92 | 299.0 | 106.8 | -4.24 | 0.45 |
| 5p                                                                               | R <sub>1,3,4</sub> =OH,                | ● | ● | ● | ● | 1.58 | -2.62 | 315.0 | 127.0 | -2.66 | 0.48 |
| 5c                                                                               | R <sub>1,2,3,4</sub> =OH,              | ● | ● | ● | ● | 1.24 | -2.33 | 331.0 | 147.3 | -1.76 | 0.52 |
|                                                                                  | R <sub>1,2,4</sub> =OH,                |   |   |   |   |      |       |       |       |       |      |
| 5f                                                                               | R <sub>3</sub> =OCH <sub>3</sub> ,     | ● | ● | ● | ● | 1.51 | -2.64 | 345.0 | 136.3 | -2.15 | 0.39 |
|                                                                                  | R <sub>1,2,4</sub> =OH,                |   |   |   |   |      |       |       |       |       |      |
| 5s*                                                                              | R <sub>3,5</sub> =OCH <sub>3</sub> ,   | ● | ● | ● | ● | 1.44 | -2.66 | 375.0 | 145.5 | -1.42 | 0.41 |
| Tranilast                                                                        | R <sub>3,4</sub> =OCH <sub>3</sub> ,   | ● | ● | ● | ● | 2.48 | -3.55 | 327.0 | 84.86 | 2.74  | 0.51 |
|                                                                                  | R <sub>1,3</sub> =OH,                  |   |   |   |   |      |       |       |       |       |      |
| A2                                                                               | R <sub>2,4</sub> =OCH <sub>3</sub> ,   | ● | ● | ● | ● | 1.6  | -2.51 | 361.0 | 128.4 | -0.23 | 0.63 |
|                                                                                  | R <sub>4</sub> =OH,                    |   |   |   |   |      |       |       |       |       |      |
| DHA D                                                                            |                                        | ● | ● | ● | ● | 2.4  | -3.08 | 285.0 | 86.63 | 1.28  | 0.78 |
| Derivatives of 2-[[[(2E,4E)-5-phenyl-1-oxo-2,4-pentadien-1-yl]amino]benzoic acid |                                        |   |   |   |   |      |       |       |       |       |      |
| 1pd                                                                              | R <sub>4</sub> =OH,                    | ● | ● | ● | ● | 2.93 | -3.53 | 309.0 | 86.63 | 0.83  | 0.44 |
| 1cd                                                                              | R <sub>3,4</sub> =OH,                  | ● | ● | ● | ● | 2.59 | -3.23 | 325.0 | 106.8 | 1.65  | 0.49 |
|                                                                                  | R <sub>3</sub> =OCH <sub>3</sub> ,     |   |   |   |   |      |       |       |       |       |      |
| 1fd                                                                              | R <sub>4</sub> =OH,                    | ● | ● | ● | ● | 2.86 | -3.54 | 339.0 | 95.86 | 1.3   | 0.46 |
| 2ad*                                                                             | R <sub>2</sub> =OH,                    | ● | ● | ● | ● | 2.93 | -3.53 | 309.0 | 86.63 | -6.42 | 0.25 |
| 2pd/L                                                                            | R <sub>2,4</sub> =OH,                  | ● | ● | ● | ● | 2.59 | -3.23 | 325.0 | 106.8 | -1.15 | 0.52 |
| 2cd                                                                              | R <sub>2,3,4</sub> =OH,                | ● | ● | ● | ● | 2.24 | -2.93 | 341.0 | 127.0 | -0.38 | 0.6  |
| 2fd/P                                                                            | R <sub>2,4</sub> =OH,                  | ● | ● | ● | ● | 2.52 | -3.25 | 355.0 | 116.0 | -0.72 | 0.55 |

|      |                                                                                                     |   |   |   |   |      |       |       |       |       |      |
|------|-----------------------------------------------------------------------------------------------------|---|---|---|---|------|-------|-------|-------|-------|------|
| 2sd* | R <sub>3</sub> =OCH <sub>3</sub> ,<br>R <sub>2,4</sub> =OH,<br>R <sub>3,5</sub> =OCH <sub>3</sub> , | ● | ● | ● | ● | 2.45 | -3.27 | 385.0 | 125.3 | 0.05  | 0.61 |
| 3pd  | R <sub>2,4</sub> =OH,<br>R <sub>1</sub> =OCH <sub>3</sub>                                           | ● | ● | ● | ● | 2.52 | -3.25 | 355.0 | 116.0 | -1.6  | 0.48 |
| 3cd  | R <sub>2,3,4</sub> =OH,<br>R <sub>1</sub> =OCH <sub>3</sub>                                         | ● | ● | ● | ● | 2.17 | -2.95 | 371.0 | 136.3 | -0.79 | 0.55 |
| 3fd  | R <sub>2,4</sub> =OH,<br>R <sub>1,3</sub> =OCH <sub>3</sub>                                         | ● | ● | ● | ● | 2.45 | -3.27 | 385.0 | 125.3 | -1.25 | 0.49 |
| 5pd  | R <sub>1,2,4</sub> =OH                                                                              | ● | ● | ● | ● | 2.24 | -2.93 | 341.0 | 127.0 | -2.44 | 0.46 |
| 5cd  | R <sub>1,2,3,4</sub> =OH                                                                            | ● | ● | ● | ● | 1.9  | -2.64 | 357.0 | 147.3 | -1.56 | 0.51 |
| 5fd  | R <sub>1,2,4</sub> =OH,<br>R <sub>3</sub> =OCH <sub>3</sub>                                         | ● | ● | ● | ● | 2.17 | -2.95 | 371.0 | 136.3 | -1.94 | 0.47 |

AVNs marked with \* are of synthetic origin,

mutagenic, tumorigenic effect, irritant and reproductive effect, further clogP- calculated partition coefficient in system n-octanol:water, solubility in water, expressed as logS, MW- molecular weight, TPSA- topological polar surface area, drug-likeness,

drug score is given as a circlet symbol. as “semaphore” color, (green color: non-toxic, values optimal; red color: toxic, non-optimal values, orange color: mild-toxic, mild optimal values) .

**Table S3. The SwissADME calculations of AVNs.**

| Labels                                                                    |                                                               |     |      |       |                     |          |       |       |      |        |            |                                     |                         |      | Log $K_p$ | BAS  |
|---------------------------------------------------------------------------|---------------------------------------------------------------|-----|------|-------|---------------------|----------|-------|-------|------|--------|------------|-------------------------------------|-------------------------|------|-----------|------|
| Dinberg/<br>Collins                                                       | Subst.                                                        | GIA | BBBP | P-gpS | CYP inhibi-<br>tors | Lipinski | Ghose | Veber | Egan | Muegge | PAINS      | Brenk                               | LL                      | SA   |           |      |
| <i>Derivatives of 2-[(1-Oxo-3-phenyl-2-propen-1-yl)amino]benzoic acid</i> |                                                               |     |      |       |                     |          |       |       |      |        |            |                                     |                         |      |           |      |
| 1a*                                                                       | R <sub>1</sub> -R <sub>5</sub> =H                             | H   | Y    | N     | N,N,Y,N,N           | Y        | Y     | Y     | Y    | Y      | -          |                                     | XLOGP3 > 3.5            | 2.26 | -5.12     | 0.85 |
| 1p/D                                                                      | R <sub>4</sub> =OH                                            | H   | N    | N     | N,N,Y,N,N           | Y        | Y     | Y     | Y    | Y      | -          |                                     | XLOGP3 > 3.5            | 2.24 | -5.46     | 0.56 |
| 1c/F                                                                      | R <sub>3,4</sub> =OH                                          | H   | N    | N     | N,N,N,N,N           | Y        | Y     | Y     | Y    | Y      | catechol_A | Michael_acceptor_1                  | Y                       | 2.35 | -6.32     | 0.56 |
| 1f/E                                                                      | R <sub>4</sub> =OCH <sub>3</sub>                              | H   | N    | N     | N,N,Y,N,N           | Y        | Y     | Y     | Y    | Y      | -          |                                     | Y                       | 2.46 | -6.17     | 0.56 |
| 1s                                                                        | R <sub>3,5</sub> =OH,<br>R <sub>4</sub> =OCH <sub>3</sub>     | H   | N    | N     | N,N,Y,N,N           | Y        | Y     | Y     | Y    | Y      | -          |                                     | Y                       | 2.66 | -6.37     | 0.56 |
| 2a*                                                                       | R <sub>2</sub> =OH                                            | H   | N    | N     | N,N,N,N,N           | Y        | Y     | Y     | Y    | Y      | -          | hydroquinone,                       | Y                       | 2.32 | -5.96     | 0.56 |
| 2p/A                                                                      | R <sub>2,4</sub> =OH                                          | H   | N    | N     | N,N,N,N,N           | Y        | Y     | Y     | Y    | Y      | -          | Michael_acceptor_1                  | Y                       | 2.36 | -6.32     | 0.56 |
| 2c/C                                                                      | R <sub>2,3,4</sub> =OH                                        | H   | N    | N     | N,N,N,N,N           | Y        | Y     | Y     | Y    | Y      | catechol_A | none, Mi-<br>chael_acceptor_1       | Y                       | 2.47 | -6.75     | 0.56 |
| 2f/B                                                                      | R <sub>2,4</sub> =OH,<br>R <sub>3</sub> =OCH <sub>3</sub>     | H   | N    | N     | N,N,Y,N,N           | Y        | Y     | Y     | Y    | Y      | -          |                                     | Y                       | 2.57 | -6.52     | 0.56 |
| 2s*                                                                       | R <sub>2,4</sub> =OH,<br>R <sub>3,5</sub> =OCH <sub>3</sub>   | H   | N    | N     | N,N,Y,N,N           | Y        | Y     | Y     | Y    | Y      | -          |                                     | MW > 350                | 2.77 | -6.72     | 0.56 |
| 2m*                                                                       | R <sub>2</sub> =OH,<br>R <sub>3,4,5</sub> =OCH <sub>3</sub>   | H   | N    | N     | N,N,Y,N,N           | Y        | Y     | Y     | Y    | Y      | -          | hydroquinone,<br>Michael_acceptor_1 | MW > 350,<br>Rotors > 7 | 2.89 | -6.58     | 0.56 |
| 3a*                                                                       | R <sub>1</sub> =OCH <sub>3</sub> ,<br>R <sub>2</sub> =OH,     | H   | N    | N     | N,N,Y,N,N           | Y        | Y     | Y     | Y    | Y      | -          |                                     | Y                       | 2.60 | -6.17     | 0.56 |
| 3p                                                                        | R <sub>1</sub> =OCH <sub>3</sub> ,<br>R <sub>2,4</sub> =OH,   | H   | N    | N     | N,N,Y,N,N           | Y        | Y     | Y     | Y    | Y      | -          |                                     | Y                       | 2.64 | -6.52     | 0.56 |
| 3c                                                                        | R <sub>1</sub> =OCH <sub>3</sub> ,<br>R <sub>2,3,4</sub> =OH, | H   | N    | N     | Y,N,N,N,N           | Y        | Y     | Y     | N    | Y      | catechol_A | catechol, hydroqui-<br>none, Mi-    | Y                       | 2.73 | -6.95     | 0.56 |

|           |                                                                 |   |   |   |           |          |   |               |                 |         |            |                                                      |                         |      |       |      |
|-----------|-----------------------------------------------------------------|---|---|---|-----------|----------|---|---------------|-----------------|---------|------------|------------------------------------------------------|-------------------------|------|-------|------|
|           |                                                                 |   |   |   |           |          |   |               |                 |         |            | chael_acceptor_1                                     |                         |      |       |      |
| 3f        | R <sub>1,3</sub> =OCH <sub>3</sub> ,<br>R <sub>2,4</sub> =OH,   | H | N | N | N,N,Y,N,N | Y        | Y | Y             | Y               | Y       | -          | hydroquinone,<br>Michael_acceptor_1                  | MW > 350                | 2.85 | -6.72 | 0.56 |
| 3h* (1)   | R <sub>1,3,5</sub> =OCH <sub>3</sub> ,<br>R <sub>2</sub> =OH,   | H | N | N | N,N,Y,N,N | Y        | Y | Y             | Y               | Y       | -          | hydroquinone,<br>Michael_acceptor_1                  | MW > 350,<br>Rotors > 7 | 3.01 | -6.58 | 0.56 |
| 3h* (2)   | R <sub>1,3,4</sub> =OCH <sub>3</sub> ,<br>R <sub>2</sub> =OH,   | H | N | N | N,N,Y,N,N | Y        | Y | Y             | Y               | Y       | -          | Michael_acceptor_1                                   | MW > 350,<br>Rotors > 7 | 2.96 | -6.58 | 0.56 |
| 4p/G      | R <sub>1,4</sub> =OH,                                           | H | N | N | N,N,N,N,N | Y        | Y | Y             | Y               | Y       | -          | Michael_acceptor_1                                   | Y                       | 2.41 | -6.32 | 0.56 |
| 4c/K      | R <sub>1,3,4</sub> =OH,                                         | H | N | N | N,N,N,N,N | Y        | Y | Y             | Y               | Y       | catechol_A | catechol, Mi-<br>chael_acceptor_1                    | Y                       | 2.51 | -6.75 | 0.56 |
| 4f        | R <sub>1,,4</sub> =OH,<br>R <sub>3</sub> =OCH <sub>3</sub> ,    | H | N | N | N,N,Y,N,N | Y        | Y | Y             | Y               | Y       | -          | Michael_acceptor_1                                   | Y                       | 2.61 | -6.52 | 0.56 |
| 5a*       | R <sub>1,2</sub> =OH,                                           | H | N | N | N,N,N,N,N | Y        | Y | Y             | Y               | Y       | catechol_A | catechol, hydroqui-<br>none, Mi-<br>chael_acceptor_1 | Y                       | 2.50 | -6.32 | 0.56 |
| 5p        | R <sub>1,3,4</sub> =OH,                                         | H | N | N | N,N,N,N,N | Y        | Y | Y             | Y               | Y       | catechol_A |                                                      | Y                       | 2.53 | -6.67 | 0.56 |
| 5c        | R <sub>1,2,34</sub> =OH,                                        | L | N | N | Y,N,N,N,N | nHBD > 5 | Y | TPSA<br>> 140 | TPSA<br>> 131.6 | nHBD> 5 | catechol_A |                                                      | Y                       | 2.62 | -7.01 | 0.56 |
| 5f        | R <sub>1,2,4</sub> =OH,<br>R <sub>3</sub> =OCH <sub>3</sub> ,   | H | N | N | Y,N,Y,N,N | Y        | Y | Y             | TPSA<br>> 131.6 | Y       | catechol_A | catechol, hydroqui-<br>none, Mi-<br>chael_acceptor_1 | Y                       | 2.72 | -6.87 | 0.56 |
| 5s*       | R <sub>1,2,4</sub> =OH,<br>R <sub>3,5</sub> =OCH <sub>3</sub> , | L | N | N | Y,N,Y,N,N | Y        | Y | TPSA<br>> 140 | TPSA<br>> 131.6 | Y       | catechol_A |                                                      | MW > 350                | 2.91 | -7.07 | 0.56 |
| Tranilast | R <sub>3,4</sub> =OCH <sub>3</sub> ,                            | H | N | N | N,N,Y,N,N | Y        | Y | Y             | Y               | Y       | -          | Michael_acceptor_1                                   | Y                       | 2.57 | -6.02 | 0.56 |
| A2        | R <sub>1,3</sub> =OH,<br>R <sub>2,4</sub> =OCH <sub>3</sub> ,   | H | N | N | Y,N,Y,N,N | Y        | Y | Y             | Y               | Y       | -          | het-C-het_not_in_rin<br>g, hydroquinone,             | MW > 350                | 2.89 | -7.50 | 0.55 |



| DHA D                                                                                   | R <sub>4</sub> =OH,                                           | H | N | N | N,N,N,N,N | Y | Y | Y | Y          | Y | -          | -                                                                | Y                               | 1.80 | -5.62 | 0.56 |
|-----------------------------------------------------------------------------------------|---------------------------------------------------------------|---|---|---|-----------|---|---|---|------------|---|------------|------------------------------------------------------------------|---------------------------------|------|-------|------|
| <i>Derivatives of 2-[[[(2E,4E)-5-phenyl-1-oxo-2,4-pentadien-1-yl]amino]benzoic acid</i> |                                                               |   |   |   |           |   |   |   |            |   |            |                                                                  |                                 |      |       |      |
| 1pd                                                                                     | R <sub>4</sub> =OH,                                           | H | N | N | N,N,Y,N,N | Y | Y | Y | Y          | Y | -          | Michael_acceptor_1,<br>polyene                                   | No; 1 violation:<br>XLOGP > 3.5 | 2.64 | -5.17 | 0.56 |
| 1cd                                                                                     | R <sub>3,4</sub> =OH,                                         | H | N | N | N,N,Y,N,N | Y | Y | Y | Y          | Y | catechol_A | catechol, Mi-<br>chael_acceptor_1,<br>polyene                    | Y                               | 2.73 | -6.02 | 0.56 |
| 1fd                                                                                     | R <sub>3</sub> =OCH <sub>3</sub> ,<br>R <sub>4</sub> =OH,     | H | N | N | N,N,Y,N,N | Y | Y | Y | Y          | Y | -          | Michael_acceptor_1,<br>polyene                                   | XLOGP > 3.5                     | 2.82 | -5.87 | 0.56 |
| 2ad*                                                                                    | R <sub>2</sub> =OH,                                           | H | N | N | N,N,Y,N,N | Y | Y | Y | Y          | Y | -          | hydroquinone,                                                    | XLOGP > 3.5                     | 2.70 | -5.67 | 0.56 |
| 2pd/L                                                                                   | R <sub>2,4</sub> =OH,                                         | H | N | N | N,N,Y,N,N | Y | Y | Y | Y          | Y | -          | Michael_acceptor_1,<br>polyene                                   | Y                               | 2.74 | -6.02 | 0.56 |
| 2cd                                                                                     | R <sub>2,3,4</sub> =OH,                                       | H | N | N | N,N,Y,N,N | Y | Y | Y | Y          | Y | catechol_A | catechol, hydroqui-<br>none, Mi-<br>chael_acceptor_1,<br>polyene | Y                               | 2.83 | -6.37 | 0.56 |
| 2fd/P                                                                                   | R <sub>2,4</sub> =OH,<br>R <sub>3</sub> =OCH <sub>3</sub> ,   | H | N | N | N,N,Y,N,N | Y | Y | Y | Y          | Y | -          |                                                                  | MW > 350                        | 2.92 | -6.22 | 0.56 |
| 2sd*                                                                                    | R <sub>2,4</sub> =OH,<br>R <sub>3,5</sub> =OCH <sub>3</sub> , | H | N | N | N,N,Y,N,N | Y | Y | Y | Y          | Y | -          | hydroquinone,<br>Michael_acceptor_1,<br>polyene                  | MW > 350,<br>Rotors > 7         | 3.11 | -6.42 | 0.56 |
| 3pd                                                                                     | R <sub>2,4</sub> =OH,<br>R <sub>1</sub> =OCH <sub>3</sub>     | H | N | N | N,N,Y,N,N | Y | Y | Y | Y          | Y | -          |                                                                  | MW > 350                        | 2.98 | -6.22 | 0.56 |
| 3cd                                                                                     | R <sub>2,3,4</sub> =OH,<br>R <sub>1</sub> =OCH <sub>3</sub>   | H | N | N | N,N,Y,N,N | Y | Y | Y | ><br>131.6 | Y | catechol_A | catechol, hydroqui-<br>none, Mi-<br>chael_acceptor_1,<br>polyene | MW > 350                        |      | -6.57 | 0.56 |

|     |                                                             |   |   |   |           |   |   |               |           |           |            |                                                                  |                         |       |      |
|-----|-------------------------------------------------------------|---|---|---|-----------|---|---|---------------|-----------|-----------|------------|------------------------------------------------------------------|-------------------------|-------|------|
| 3fd | R <sub>2,4</sub> =OH,<br>R <sub>1,3</sub> =OCH <sub>3</sub> | H | N | N | N,N,Y,N,N | Y | Y | Y             | Y         | Y         | -          | hydroquinone,<br>Michael_acceptor_1,<br>polyene                  | MW > 350,<br>Rotors > 7 | -6.42 | 0.56 |
| 5pd | R <sub>1,2,4</sub> =OH                                      | H | N | N | N,N,Y,N,N | Y | Y | Y             | Y         | Y         | catechol_A | Y                                                                | Y                       | -6.37 | 0.56 |
| 5cd | R <sub>1,2,3,4</sub> =OH                                    | L | N | N | Y,N,Y,N,N | Y | Y | TPSA<br>> 140 | TPSA<br>> | H-don > 5 | catechol_A | catechol, hydroqui-<br>none, Mi-<br>chael_acceptor_1,<br>polyene | MW > 350                | -6.72 | 0.56 |
| 5fd | R <sub>1,2,4</sub> =OH,<br>R <sub>3</sub> =OCH <sub>3</sub> | H | N | N | N,N,Y,N,N | Y | Y | Y             | TPSA<br>> | Y         | catechol_A | polyene                                                          | MW > 350                | -6.57 | 0.56 |

AVNs marked with \* are of synthetic origin,

Y-Yes, N – No, H = High,

GIA - gastrointestinal absorption, BBB = Blood brain barrier permeability, P-gpS – P-glycoprotein substrate, CYP inhibitors - cytochrome P450 (in exact order 1A2, 2C19, 2C9, 2D6, 3A4) inhibitors, drug-likeness by five different approaches /Lipinski, Ghose, Veber, Egan, Muegge/, PAINS - pan assay interference structures, Brenk - structural alert by Brenk, LL – lead-likeness, SA - synthetic accessibility, BAS - bioavailability score /BAS/.
